# Supplementary material for: Atmosphere–ocean exchange of heavy metals and polycyclic aromatic hydrocarbons in the Russian Arctic Ocean
Source: Copernicus journal article supplement (doi:10.5194/acp-2019-653), 2019-08-01
Supplement: Supplementary file 1 [file acp-2019-653-supplement.pdf]

# Supplementary Material

## Atmosphere–ocean exchange of heavy metals and polycyclic aromatic hydrocarbons in the Russian Arctic Ocean

Xiaowen Ji<sup>1,2</sup>, Evgeny Abakumov<sup>2</sup>, Xianchuan Xie<sup>1\*</sup>

<sup>1</sup> *State Key Laboratory of Pollution Control and Resource Reuse, Center for Hydrosciences Research, School of the Environment, Nanjing University, 210093, Nanjing, P. R. China*

<sup>2</sup> *Department of Applied Ecology, Saint Petersburg State University, 16-line, 29, Vasilyevskiy Island, 199178, Saint Petersburg, Russian Federation*

**Table number: 4**

**Figure number: 7**

\* Corresponding author's e-mail: [xchxie@nju.edu.cn](mailto:xchxie@nju.edu.cn)

**Table S1.** Mean concentrations of heavy metals in gas, aerosol, and dissolved phase blanks.

|                          | Gas phase                 |                                | Aerosol phase             |                                | Dissolved phase           |                                |
|--------------------------|---------------------------|--------------------------------|---------------------------|--------------------------------|---------------------------|--------------------------------|
|                          | Field blank<br>(total ng) | Laboratory blank<br>(total ng) | Field blank<br>(total ng) | Laboratory blank<br>(total ng) | Field blank<br>(total ng) | Laboratory blank<br>(total ng) |
| Cd                       | 0.010                     | 0.005                          | 0.002                     | 0.009                          | 0.004                     | 0.006                          |
| Cu                       | 0.008                     | 0.009                          | 0.002                     | 0.008                          | 0.009                     | 0.004                          |
| Co                       | 0.002                     | 0.009                          | 0.009                     | 0.001                          | 0.003                     | 0.005                          |
| Mn                       | 0.005                     | 0.005                          | 0.009                     | 0.009                          | 0.006                     | 0.007                          |
| Fe                       | 0.009                     | 0.003                          | 0.004                     | 0.006                          | 0.005                     | 0.009                          |
| Ni                       | 0.002                     | 0.003                          | 0.009                     | 0.007                          | 0.010                     | 0.002                          |
| Pb                       | 0.002                     | 0.009                          | 0.007                     | 0.010                          | 0.006                     | 0.007                          |
| Zn                       | 0.008                     | 0.005                          | 0.003                     | 0.006                          | 0.004                     | 0.004                          |
| Hg                       | 0.049                     | 0.002                          | 0.001                     | 0.009                          | 0.006                     | 0.009                          |
| $\Sigma_{\text{metals}}$ | <b>0.049</b>              | <b>0.052</b>                   | <b>0.046</b>              | <b>0.065</b>                   | <b>0.053</b>              | <b>0.052</b>                   |

**Table S2.** Mean concentrations of PAHs in gas, aerosol, and dissolved phase blanks.

|                                 | Gas phase      |                     | Aerosol phase  |                     | Dissolved phase |                     |
|---------------------------------|----------------|---------------------|----------------|---------------------|-----------------|---------------------|
|                                 | Field<br>blank | Laboratory<br>blank | Field<br>blank | Laboratory<br>blank | Field<br>blank  | Laboratory<br>blank |
|                                 | (total ng)     | (total ng)          | (total ng)     | (total ng)          | (total ng)      | (total ng)          |
| Naphthalene                     | 0.20           | 0.17                | 0.11           | 0.08                | 0.09            | 0.05                |
| 1-methylnaphthalene             | 0.12           | 0.17                | 0.03           | 0.04                | 0.01            | 0.00                |
| 2-methylnaphthalene             | 0.10           | 0.05                | 0.09           | 0.10                | 0.12            | 0.10                |
| 1,4,5-trimethylnaphthalene      | 0.16           | 0.13                | 0.20           | 0.07                | 0.02            | 0.15                |
| 1,2,5,6-tetramethylnaphthalene  | 0.20           | 0.14                | 0.01           | 0.08                | 0.00            | 0.09                |
| Acenaphthylene                  | 0.13           | 0.03                | 0.05           | 0.15                | 0.11            | 0.13                |
| Acenaphthene                    | 0.13           | 0.13                | 0.03           | 0.18                | 0.04            | 0.15                |
| Fluorene                        | 0.19           | 0.08                | 0.10           | 0.10                | 0.21            | 0.21                |
| Dibenzothiophene                | 0.01           | 0.06                | 0.02           | 0.03                | 0.13            | 0.09                |
| Anthracene                      | 0.06           | 0.16                | 0.00           | 0.19                | 0.12            | 0.10                |
| 9-methylfluorene                | 0.20           | 0.16                | 0.13           | 0.08                | 0.07            | 0.07                |
| 1,7-dimethylfluorene            | 0.18           | 0.16                | 0.04           | 0.02                | 0.12            | 0.02                |
| 9-n-propylfluorene              | 0.14           | 0.13                | 0.12           | 0.00                | 0.10            | 0.07                |
| 2-methyldibenzothiophene        | 0.03           | 0.10                | 0.05           | 0.04                | 0.04            | 0.17                |
| 2,4-dimethyldibenzothiophene    | 0.13           | 0.18                | 0.04           | 0.03                | 0.00            | 0.06                |
| 2,4,7-trimethyldibenzothiophene | 0.09           | 0.00                | 0.18           | 0.13                | 0.12            | 0.13                |
| 3-methylphenanthrene            | 0.06           | 0.09                | 0.09           | 0.05                | 0.07            | 0.08                |
| 1,6-dimethylphenanthrene        | 0.12           | 0.09                | 0.17           | 0.06                | 0.12            | 0.01                |
| 1,2,9-trimethylphenanthrene     | 0.21           | 0.15                | 0.04           | 0.11                | 0.21            | 0.19                |
| 1,2,6,9-tetramethylphenanthrene | 0.10           | 0.06                | 0.03           | 0.20                | 0.15            | 0.04                |
| Fluoranthene                    | 0.20           | 0.04                | 0.14           | 0.03                | 0.20            | 0.02                |
| Pyrene                          | 0.09           | 0.15                | 0.04           | 0.07                | 0.15            | 0.06                |
| Benzo[a]anthracene              | 0.01           | 0.13                | 0.05           | 0.02                | 0.03            | 0.01                |
| Chrysene                        | 0.04           | 0.05                | 0.05           | 0.18                | 0.14            | 0.05                |
| 3-methylchrysene                | 0.15           | 0.14                | 0.09           | 0.16                | 0.11            | 0.11                |
| $\sum_{\text{PAHs}}$            | <b>2.83</b>    | <b>2.61</b>         | <b>1.78</b>    | <b>2.14</b>         | <b>2.38</b>     | <b>2.12</b>         |

**Table S3.** Mean concentrations of heavy metals per sea for each measured matrix.

|                          | Gas Phase (ng m <sup>-3</sup> ) |              |             |                   | Aerosol Phase (ng m <sup>-3</sup> ) |              |              |                   | Dissolved Phase (ng L <sup>-1</sup> ) |              |              |                   |
|--------------------------|---------------------------------|--------------|-------------|-------------------|-------------------------------------|--------------|--------------|-------------------|---------------------------------------|--------------|--------------|-------------------|
|                          | Barents Sea                     | Kara Sea     | Leptev Sea  | East Siberian Sea | Barents Sea                         | Kara Sea     | Leptev Sea   | East Siberian Sea | Barents Sea                           | Kara Sea     | Leptev Sea   | East Siberian Sea |
| Cd                       | 0.003                           | 0.003        | 0.002       | 0.003             | 0.014                               | 0.013        | 0.011        | 0.013             | 0.004                                 | 0.003        | 0.003        | 0.003             |
| Cu                       | 0.001                           | 0.001        | 0.001       | 0.001             | 0.023                               | 0.018        | 0.014        | 0.017             | 0.006                                 | 0.005        | 0.004        | 0.005             |
| Co                       | 0.001                           | 0.001        | 0.001       | 0.001             | 0.008                               | 0.006        | 0.003        | 0.005             | 0.002                                 | 0.001        | 0.001        | 0.001             |
| Mn                       | 0.061                           | 0.042        | 0.005       | 0.031             | 0.432                               | 0.278        | 0.035        | 0.131             | 0.093                                 | 0.063        | 0.008        | 0.053             |
| Fe                       | 0.065                           | 0.054        | 0.040       | 0.044             | 1.325                               | 1.066        | 0.836        | 0.909             | 0.335                                 | 0.268        | 0.176        | 0.230             |
| Ni                       | 0.006                           | 0.006        | 0.007       | 0.007             | 0.030                               | 0.032        | 0.033        | 0.035             | 0.007                                 | 0.008        | 0.008        | 0.009             |
| Pb                       | 0.194                           | 0.209        | 0.055       | 0.112             | 0.188                               | 0.137        | 0.033        | 0.068             | 0.053                                 | 0.029        | 0.008        | 0.028             |
| Zn                       | 0.083                           | 0.080        | 0.066       | 0.076             | 1.688                               | 1.392        | 1.296        | 1.392             | 0.395                                 | 0.403        | 0.317        | 0.358             |
| Hg                       | 0.004                           | 0.005        | 0.003       | 0.005             | 0.005                               | 0.004        | 0.003        | 0.003             | 0.001                                 | 0.001        | 0.001        | 0.001             |
| $\Sigma_{\text{metals}}$ | <b>0.418</b>                    | <b>0.401</b> | <b>0.18</b> | <b>0.28</b>       | <b>3.713</b>                        | <b>2.946</b> | <b>2.264</b> | <b>2.573</b>      | <b>0.896</b>                          | <b>0.781</b> | <b>0.526</b> | <b>0.688</b>      |

**Table S4.** Mean concentrations of PAHs per sea for each measured matrix.

|                                 | Gas Phase (ng m <sup>-3</sup> ) |             |               |                      | Aerosol Phase (ng m <sup>-3</sup> ) |             |               |                      | Dissolved Phase (ng L <sup>-1</sup> ) |             |               |                      |
|---------------------------------|---------------------------------|-------------|---------------|----------------------|-------------------------------------|-------------|---------------|----------------------|---------------------------------------|-------------|---------------|----------------------|
|                                 | Barents<br>Sea                  | Kara<br>Sea | Leptev<br>Sea | East Siberian<br>Sea | Barents<br>Sea                      | Kara<br>Sea | Leptev<br>Sea | East Siberian<br>Sea | Barents<br>Sea                        | Kara<br>Sea | Leptev<br>Sea | East Siberian<br>Sea |
| Naphthalene                     | 0.634                           | 0.576       | 0.450         | 0.511                | 6.015                               | 3.185       | 0.493         | 2.062                | 4.103                                 | 3.559       | 0.808         | 2.077                |
| 1-methylnaphthalene             | 0.550                           | 0.587       | 0.615         | 0.522                | 5.739                               | 3.877       | 0.442         | 1.536                | 3.993                                 | 3.384       | 0.868         | 1.880                |
| 2-methylnaphthalene             | 0.566                           | 0.407       | 0.587         | 0.574                | 3.970                               | 3.964       | 0.596         | 1.515                | 4.633                                 | 2.457       | 0.820         | 2.334                |
| 1,4,5-trimethylnaphthalene      | 0.449                           | 0.630       | 0.655         | 0.565                | 5.911                               | 3.426       | 0.481         | 1.360                | 5.164                                 | 3.376       | 0.794         | 2.350                |
| 1,2,5,6-tetramethylnaphthalene  | 0.571                           | 0.616       | 0.500         | 0.612                | 6.068                               | 3.782       | 0.423         | 1.801                | 4.899                                 | 3.141       | 0.722         | 2.305                |
| Acenaphthylene                  | 0.539                           | 0.599       | 0.568         | 0.584                | 6.743                               | 3.990       | 0.570         | 1.394                | 3.470                                 | 3.035       | 0.824         | 2.246                |
| Acenaphthene                    | 0.596                           | 0.597       | 0.531         | 0.538                | 5.506                               | 2.890       | 0.571         | 2.207                | 4.120                                 | 3.021       | 0.791         | 1.781                |
| Fluorene                        | 1.251                           | 1.396       | 1.338         | 1.265                | 5.496                               | 3.657       | 0.439         | 1.298                | 4.334                                 | 3.127       | 0.755         | 2.520                |
| Dibenzothiophene                | 1.281                           | 1.323       | 1.301         | 1.257                | 6.062                               | 2.967       | 0.474         | 0.746                | 2.208                                 | 1.473       | 0.529         | 1.913                |
| Anthracene                      | 1.309                           | 1.345       | 1.348         | 1.323                | 6.712                               | 3.346       | 0.378         | 1.635                | 1.908                                 | 1.783       | 0.499         | 1.370                |
| 9-methylfluorene                | 1.368                           | 1.280       | 1.313         | 1.249                | 5.588                               | 3.195       | 0.529         | 1.505                | 2.006                                 | 1.670       | 0.512         | 1.826                |
| 1,7-dimethylfluorene            | 1.322                           | 1.307       | 1.274         | 1.323                | 4.782                               | 3.574       | 0.440         | 1.203                | 1.585                                 | 1.461       | 0.469         | 1.745                |
| 9-n-propylfluorene              | 1.254                           | 1.269       | 1.216         | 1.276                | 4.719                               | 2.838       | 0.498         | 1.626                | 1.795                                 | 1.373       | 0.659         | 1.759                |
| 2-methyldibenzothiophene        | 1.276                           | 1.384       | 1.261         | 1.244                | 5.447                               | 3.101       | 0.515         | 2.053                | 1.583                                 | 1.397       | 0.423         | 1.742                |
| 2,4-dimethyldibenzothiophene    | 1.306                           | 1.317       | 1.267         | 1.193                | 4.874                               | 2.601       | 0.562         | 1.856                | 2.298                                 | 1.261       | 0.525         | 1.519                |
| 2,4,7-trimethyldibenzothiophene | 1.278                           | 1.379       | 1.309         | 1.313                | 6.458                               | 4.140       | 0.375         | 1.840                | 2.293                                 | 1.405       | 0.439         | 1.557                |
| 3-methylphenanthrene            | 1.328                           | 1.348       | 1.300         | 1.281                | 7.181                               | 3.332       | 0.494         | 1.135                | 2.298                                 | 1.475       | 0.479         | 1.760                |
| 1,6-dimethylphenanthrene        | 1.235                           | 1.297       | 1.255         | 1.296                | 5.046                               | 2.582       | 0.556         | 1.703                | 1.769                                 | 1.127       | 0.632         | 1.536                |
| 1,2,9-trimethylphenanthrene     | 1.349                           | 1.319       | 1.305         | 1.290                | 6.174                               | 2.545       | 0.555         | 0.725                | 2.290                                 | 1.241       | 0.464         | 1.712                |
| 1,2,6,9-tetramethylphenanthrene | 1.345                           | 1.275       | 1.296         | 1.257                | 7.042                               | 3.705       | 0.635         | 1.628                | 1.629                                 | 1.046       | 0.597         | 1.795                |
| Fluoranthene                    | 0.006                           | 0.006       | 0.006         | 0.005                | 4.530                               | 2.511       | 0.453         | 1.212                | 2.075                                 | 1.358       | 0.442         | 1.766                |
| Pyrene                          | 0.004                           | 0.006       | 0.005         | 0.005                | 6.937                               | 3.952       | 1.170         | 2.919                | 0.032                                 | 0.019       | 0.005         | 0.021                |

|                                     |              |              |              |              |               |               |              |              |              |              |              |              |
|-------------------------------------|--------------|--------------|--------------|--------------|---------------|---------------|--------------|--------------|--------------|--------------|--------------|--------------|
| Benzo[a]anthracene                  | 0.006        | 0.006        | 0.005        | 0.006        | 6.990         | 4.575         | 1.052        | 3.070        | 0.027        | 0.020        | 0.004        | 0.013        |
| Chrysene                            | 0.005        | 0.004        | 0.005        | 0.005        | 7.266         | 4.899         | 1.126        | 3.410        | 0.036        | 0.011        | 0.004        | 0.013        |
| 3-methylchrysene                    | 0.005        | 0.004        | 0.005        | 0.005        | 7.504         | 4.636         | 0.902        | 3.084        | 0.026        | 0.021        | 0.005        | 0.017        |
| Naphthalene                         | 0.005        | 0.005        | 0.006        | 0.004        | 6.564         | 4.976         | 1.019        | 3.311        | 0.032        | 0.020        | 0.006        | 0.014        |
| 1-methylnaphthalene                 | 0.006        | 0.003        | 0.005        | 0.005        | 6.544         | 4.323         | 0.998        | 3.573        | 0.034        | 0.026        | 0.005        | 0.015        |
| 2-methylnaphthalene                 | 0.005        | 0.005        | 0.006        | 0.005        | 6.801         | 4.156         | 1.066        | 3.265        | 0.024        | 0.025        | 0.006        | 0.017        |
| 1,4,5-trimethylnaphthalene          | 0.005        | 0.006        | 0.006        | 0.005        | 6.546         | 3.801         | 0.992        | 3.185        | 0.028        | 0.025        | 0.005        | 0.014        |
| 1,2,5,6-tetramethylnaphthalene      | 0.004        | 0.004        | 0.005        | 0.004        | 6.763         | 4.376         | 1.096        | 3.726        | 0.037        | 0.020        | 0.004        | 0.012        |
| Acenaphthylene                      | 0.005        | 0.006        | 0.005        | 0.005        | 6.590         | 4.219         | 1.084        | 2.986        | 0.042        | 0.023        | 0.004        | 0.017        |
| Acenaphthene                        | 0.005        | 0.005        | 0.004        | 0.004        | 7.233         | 4.721         | 1.117        | 2.945        | 0.029        | 0.026        | 0.005        | 0.014        |
| Fluorene                            | 0.005        | 0.006        | 0.005        | 0.005        | 6.879         | 4.611         | 1.019        | 3.507        | 0.029        | 0.015        | 0.004        | 0.014        |
| Dibenzothiophene                    | 0.004        | 0.006        | 0.005        | 0.004        | 6.725         | 4.100         | 1.058        | 3.402        | 0.033        | 0.019        | 0.007        | 0.007        |
| Anthracene                          | 0.006        | 0.005        | 0.005        | 0.006        | 6.270         | 4.340         | 0.852        | 3.298        | 0.024        | 4.021        | 0.005        | 0.010        |
| <b><math>\Sigma_{35}</math>PAHs</b> | <b>20.88</b> | <b>21.32</b> | <b>20.76</b> | <b>20.54</b> | <b>215.67</b> | <b>130.80</b> | <b>25.03</b> | <b>77.72</b> | <b>60.88</b> | <b>47.46</b> | <b>13.12</b> | <b>39.69</b> |

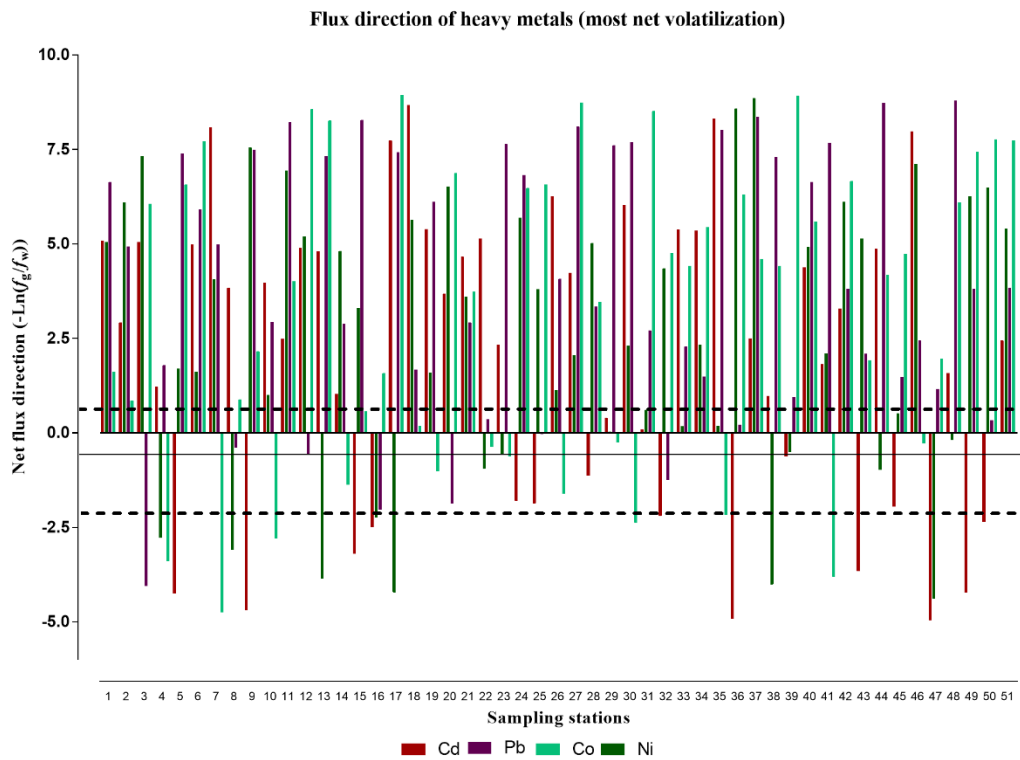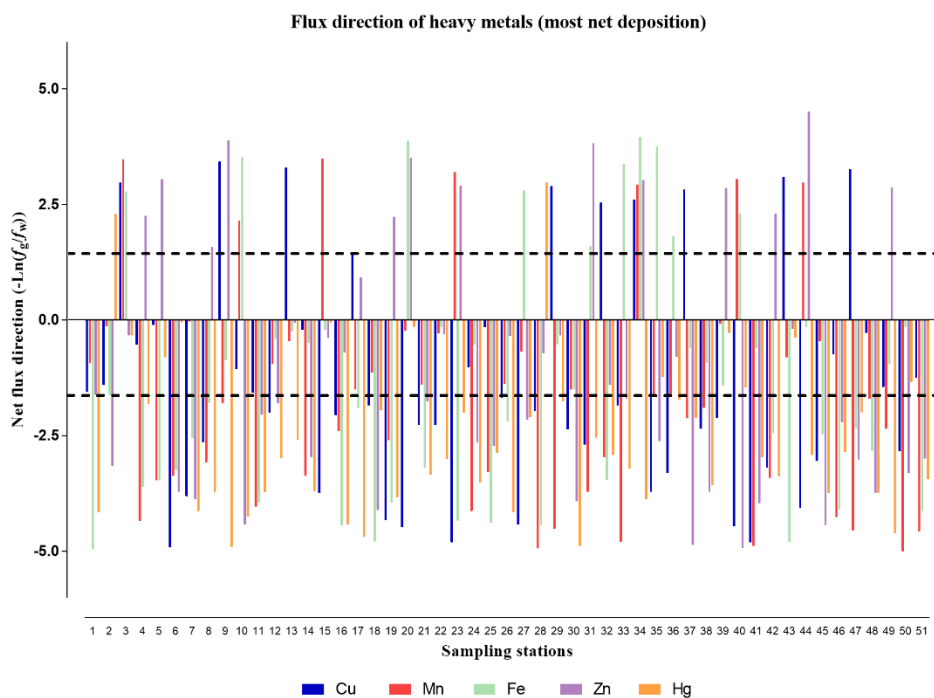

**Figure S1.** Uncertainty of the net direction of air-water diffusive fluxes. Estimated fugacity ratio of air to water ( $f_g/f_w$ ) for heavy metals for individual sampling stations. A factor of three of maximum uncertainty is considered. The chemical approaches air equilibrium when  $-\ln(f_g/f_w)$  range between 1.3 and -1.5. If  $-\ln(f_g/f_w) > 1.3$  or  $-\ln(f_g/f_w) < -1.5$ , a net deposition or net volatilization of each heavy metal occurs at the station, respectively

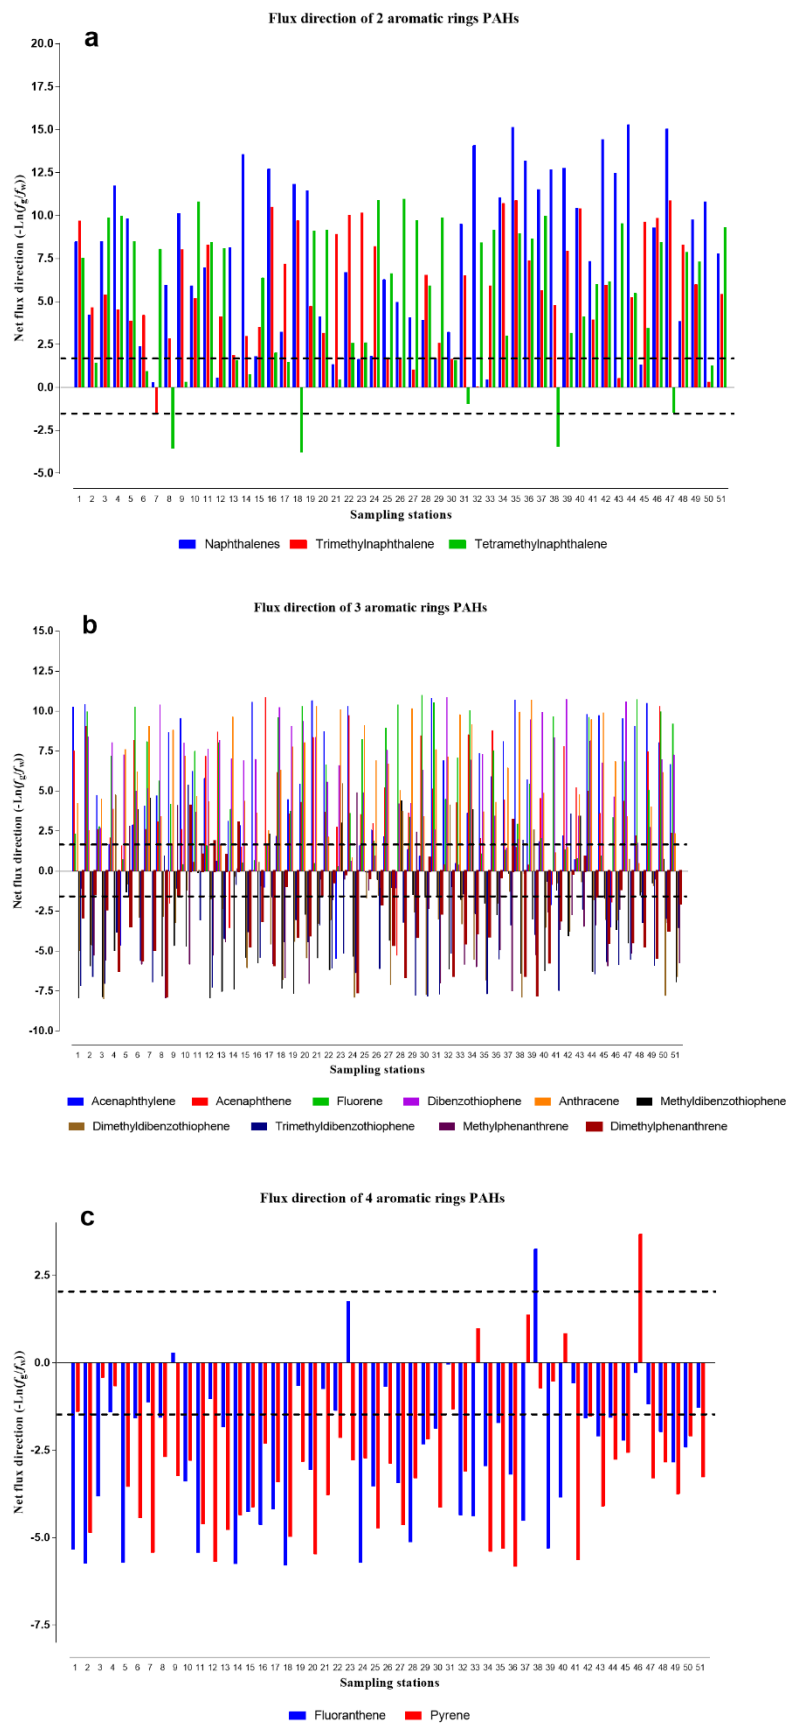

**Figure S2.** Uncertainty of the net direction of air-water diffusive fluxes. Estimated fugacity ratio of



air to water ( $f_g/f_w$ ) for 2 aromatic rings PAHs (a), 3 aromatic rings PAHs (b), 4 aromatic rings PAHs (c) for individual sampling stations. A factor of three of maximum uncertainty is considered. The chemical approaches air equilibrium when  $-\ln(f_g/f_w)$  range between 2.1 and -1.5. If  $-\ln(f_g/f_w) > 2.1$  or  $-\ln(f_g/f_w) < -1.5$ , a net deposition or net volatilization of each PAH occurs at the station, respectively.

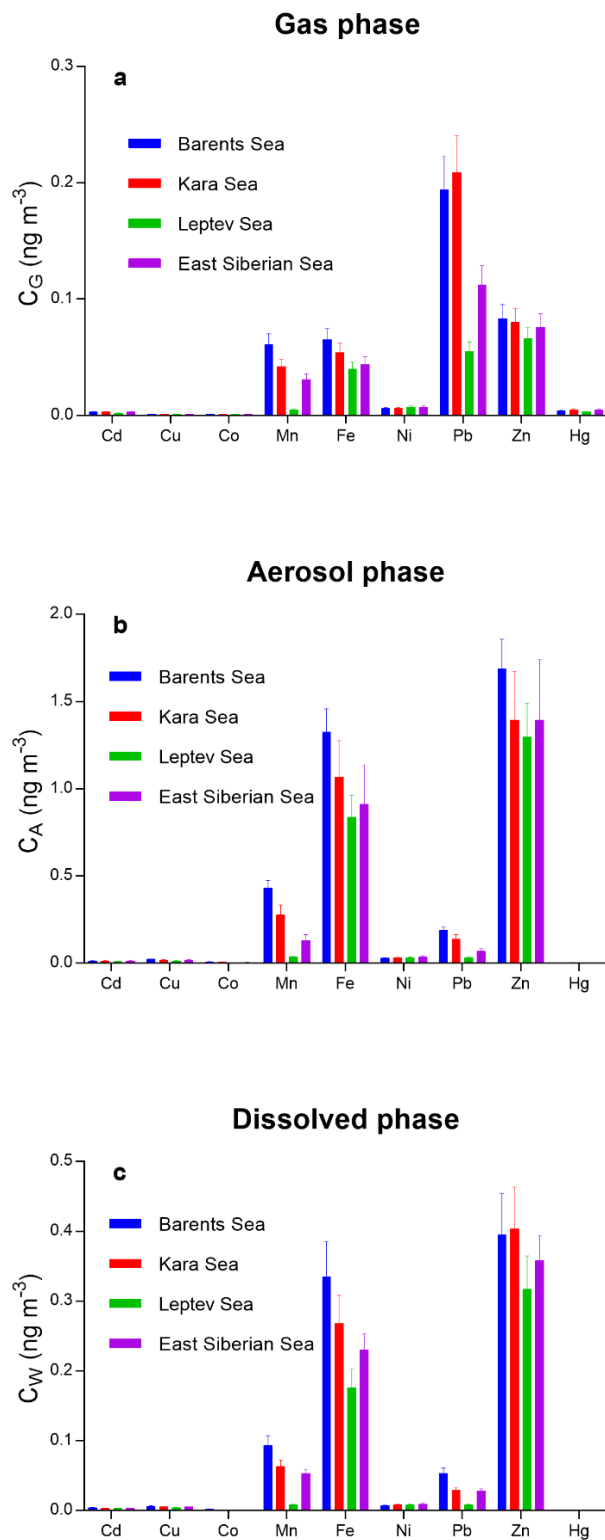

**Figure S3.** Pattern of heavy metals concentration in the oceanic atmosphere and water. Average and standard deviation of heavy metals concentrations for individual measured matrix; gas (a), aerosol (b) and dissolved phase (c). Bars represent the standard deviation of each heavy metal for each sea of Russian Arctic ocean.

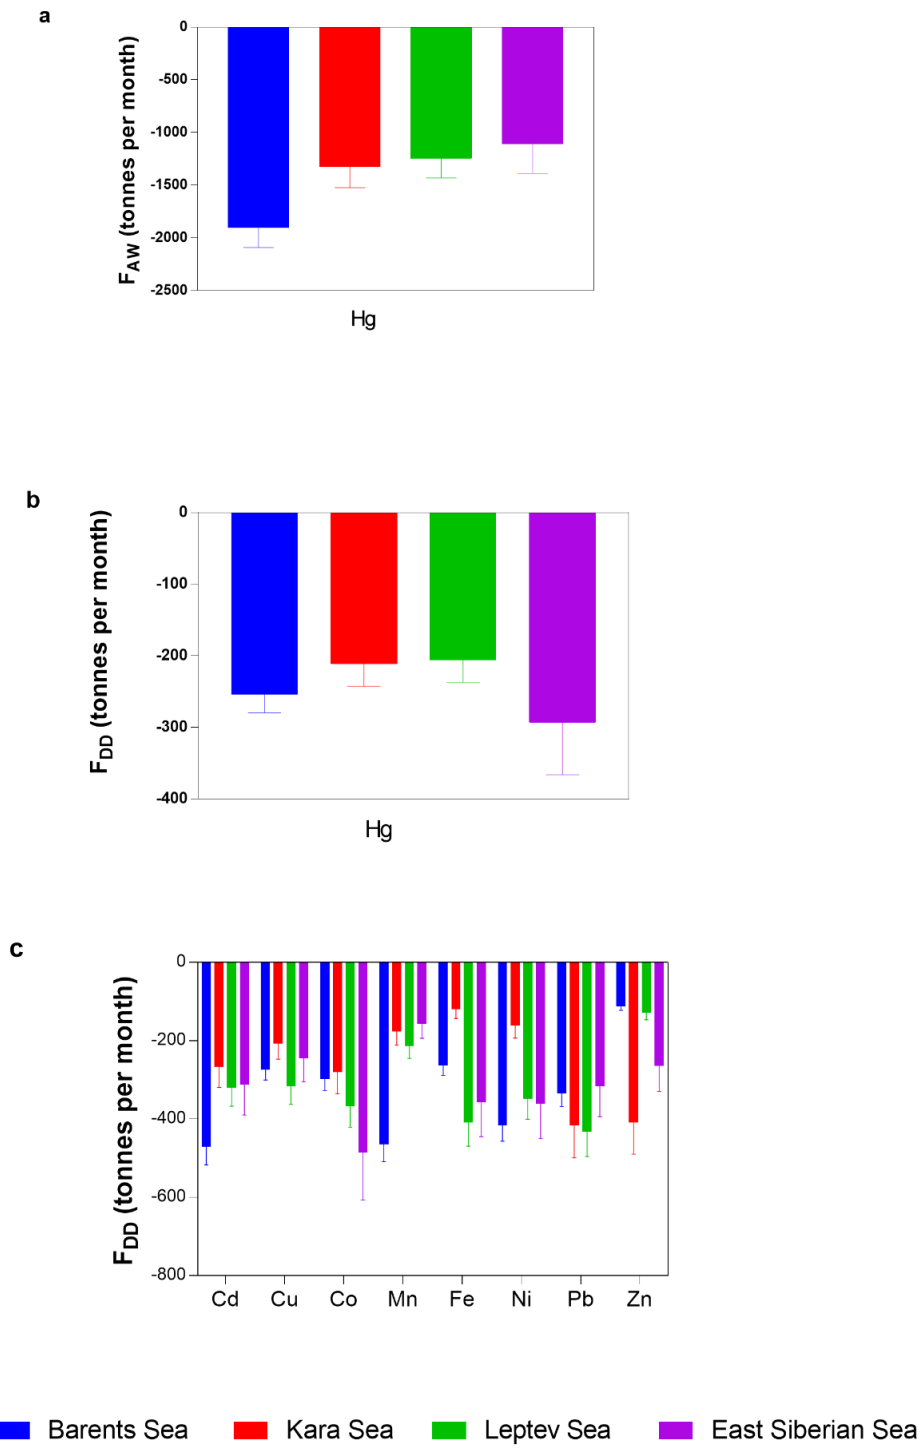

**Figure S4.** Estimates of oceanic atmosphere-ocean exchange of Hg. (a) Net diffusive air-water exchange of Hg ( $F_{AW}$ ) and (b) dry deposition of Hg and other heavy metals ( $F_{DD}$ ) fluxes averaged per month for the Barents, Kara, Laptev, and East Siberian Seas. Bars show standard deviation.

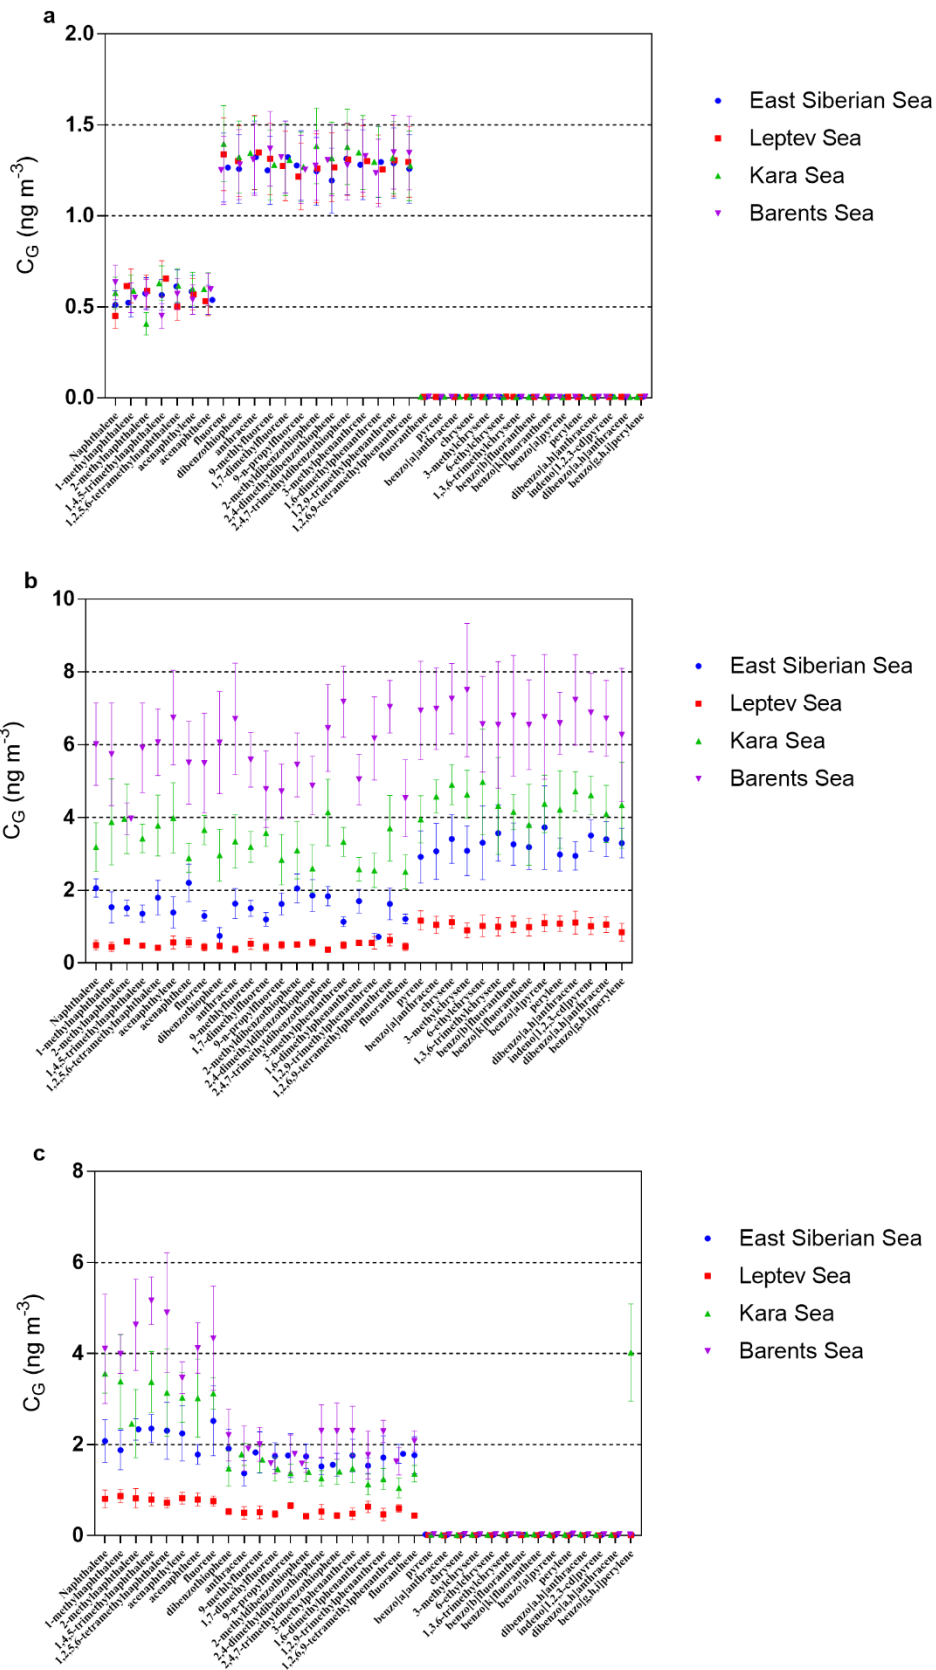

**Figure S5.** Concentration pattern of PAHs in the oceanic atmosphere and seawater. Mean and standard deviation of PAHs concentration for individual measured matrix; (a) gas, (b) aerosol, and (c) dissolved phase. Bars represent the standard deviation of individual PAH at each sea.

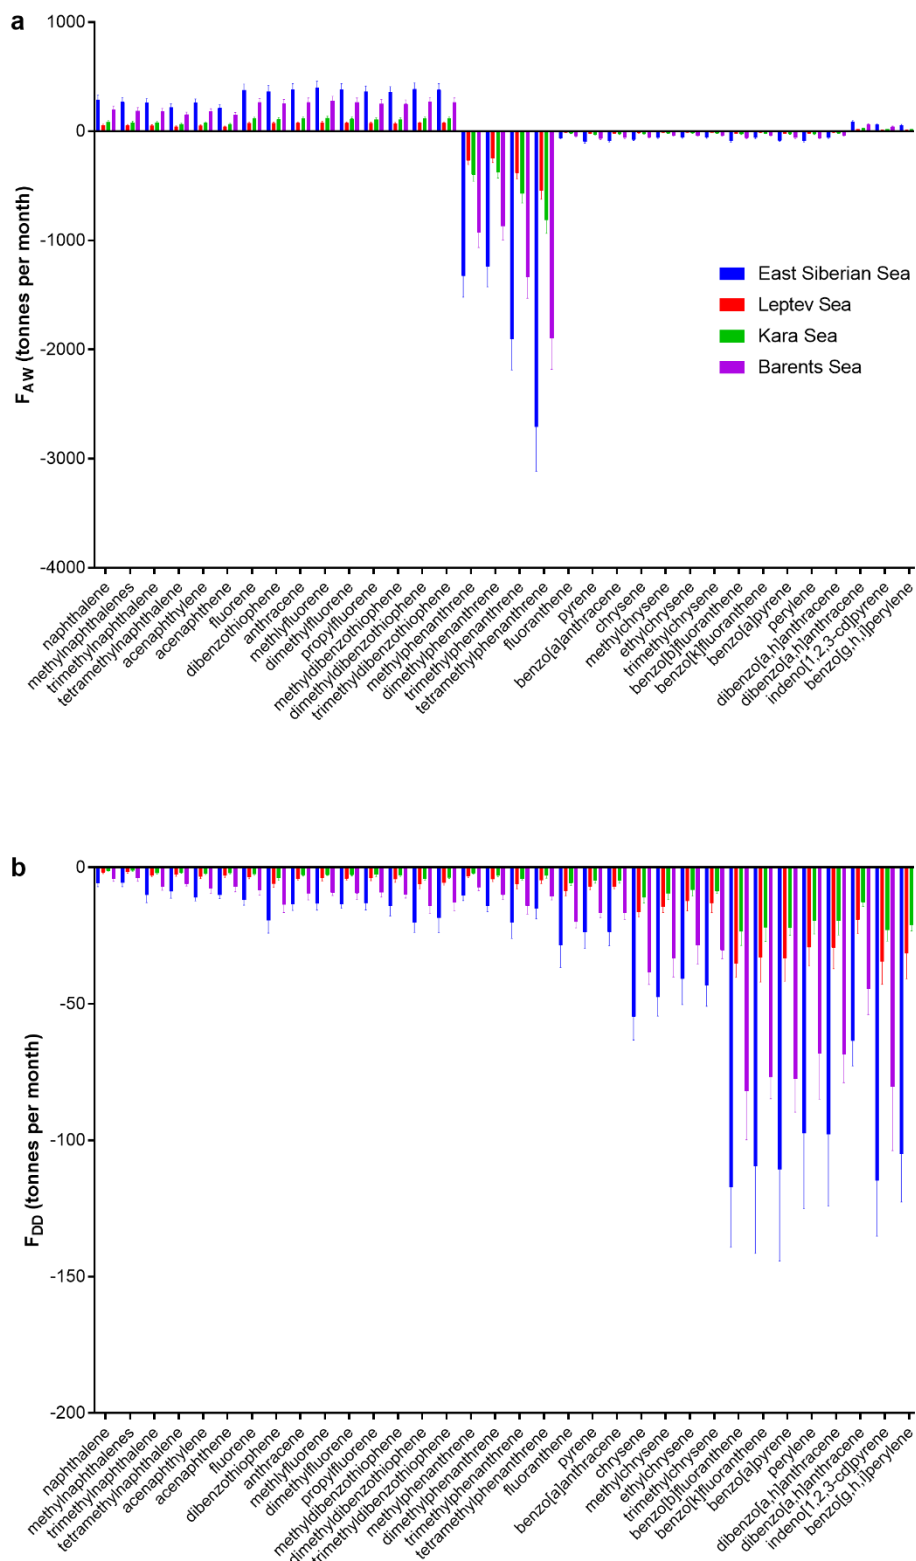

**Figure S6.** Estimated of atmosphere-ocean exchanges of PAHs in the Russian Arctic ocean. (a) Average net diffusive air-water exchange ( $F_{AW}$ ) and (b) dry deposition ( $F_{DD}$ ) fluxes per month for the East Siberian Sea, Barents Sea, Kara Sea and Leptev Sea. Bars represent standard deviation.

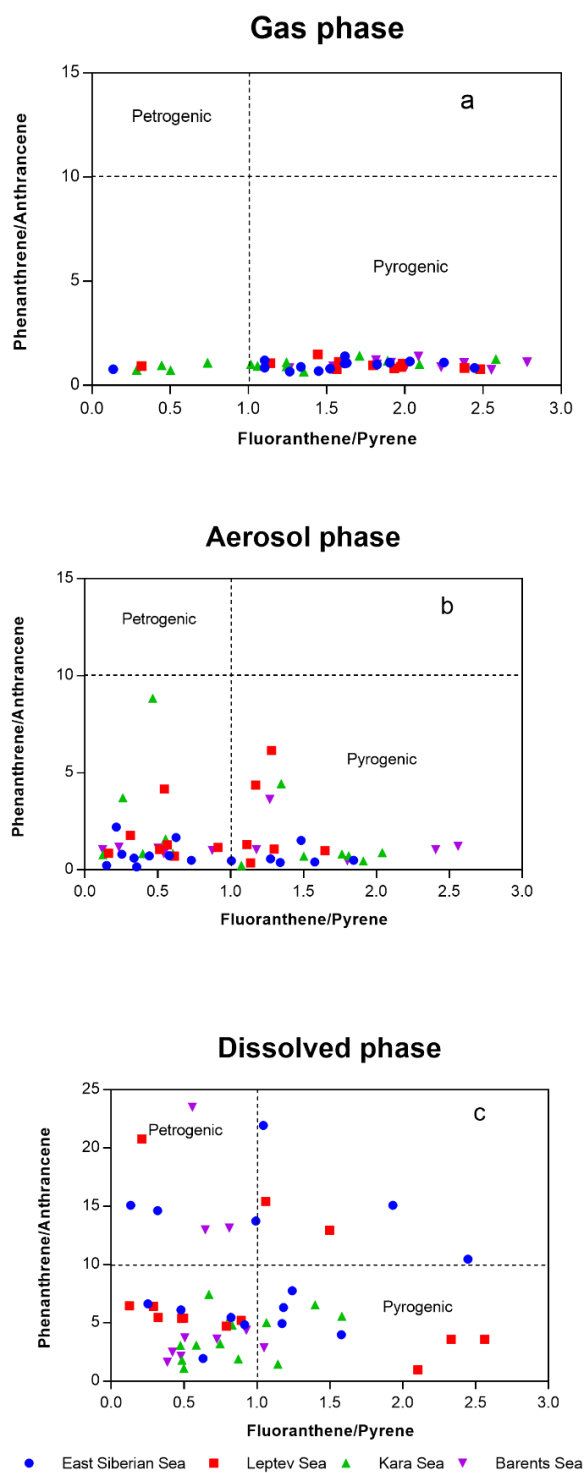

**Figure S7.** The diagnostic ratio of PAHs sources. The ratio of Phenanthrene/Anthracene to Fluoranthene/Pyrene for the gas (a), aerosol (b), and dissolved phases (c). the traditional attribution to pyrogenic and petrogenic PAHs (pairs of ratios) were used (Lima et al., 2005). The ratios were not used for characterization of biogenic PAHs due to the diagnostic ratios should be cautious to use for atmospheric samples (Katsoyiannis et al., 2011).

## References

Katsoyiannis, A., Sweetman, A.J., Jones, K.C., 2011. PAH Molecular Diagnostic Ratios Applied to Atmospheric Sources: A Critical Evaluation Using Two Decades of Source Inventory and Air Concentration Data from the UK. *Environmental Science & Technology* 45, 8897-8906.

Lima, A.L.C., Farrington, J.W., Reddy, C.M., 2005. Combustion-Derived Polycyclic Aromatic Hydrocarbons in the Environment—A Review. *Environmental Forensics* 6, 109-131.
